# Supplementary material for: Naphthyridine-based thermally activated delayed fluorescence emitters for multi-color organic light-emitting diodes with low efficiency roll-off
Source: Royal Society of Chemistry journal article supplement (doi:10.1039/c9tc00503j), 2019-01-01
Supplement: c9tc00503j1.pdf [file c9tc00503j1.pdf]

## Electronic Supplementary Information

### Naphthyridine-based thermally activated delayed fluorescence emitters for multi-color organic light-emitting diodes with low efficiency roll-off

Cheng Chen,<sup>a</sup> Hai-Yan Lu,<sup>\*,a</sup> Yin-Feng Wang,<sup>a</sup> Meng Li,<sup>b</sup> Yi-Fan Shen,<sup>a</sup> and Chuan-Feng Chen<sup>\*,a, b</sup>

<sup>a</sup>University of Chinese Academy of Sciences, Beijing 100049, China. <sup>b</sup>Beijing National Laboratory for Molecular Sciences, CAS Key Laboratory of Molecular Recognition and Function, Institute of Chemistry, Chinese Academy of Sciences, Beijing 100190, China.

E-mail: haiyanlu@ucas.ac.cn; cchen@iccas.ac.cn

### Contents

|                                                                              |     |
|------------------------------------------------------------------------------|-----|
| 1. General information .....                                                 | S2  |
| 2. X-ray crystallographic data .....                                         | S3  |
| 3. Schematic molecular conformations and interactions.....                   | S6  |
| 4. DFT calculations .....                                                    | S8  |
| 5. TGA and DSC .....                                                         | S8  |
| 6. Photophysical properties.....                                             | S9  |
| 7. Device fabrication and characterization .....                             | S10 |
| 8. Estimation of basic photophysical data.....                               | S12 |
| 9. <sup>1</sup> H NMR and <sup>13</sup> C NMR spectra of new compounds ..... | S12 |
| 10. Reference .....                                                          | S15 |

## 1. General information

All the reagents and solvents were purchased from commercial sources and used without further purification.  $^1\text{H}$  and  $^{13}\text{C}$  NMR spectra were recorded on AVIII 400 MHz NMR spectrometers in  $\text{CDCl}_3$  solutions. High resolution mass spectra were measured on a Thermo Fisher® Exactive high resolution LC-MS spectrometer. The calculation was carried out with the Gaussian 09 software package. Geometry optimizations were conducted under the M06-2X/6-31g(d,p) level of theory. Keyword 5d/7f was used in geometry optimization. Crystal structures were solved with direct methods and refined with a full-matrix least-squares technique, using the SHELXS software package. Thermal gravimetric analysis (TGA) were performed on a TA Instruments TGA 2050 thermal analyzer at a heating rate of  $10\text{ }^\circ\text{C min}^{-1}$  in nitrogen. Cyclic voltammetry was performed using a CHI600A analyzer with a scan rate of 100 mV/s at room temperature to investigate the reduction and oxidation potentials. A conventional three-electrode cell was used as electrolytic cell with a glassy carbon working electrode, an  $\text{Ag}/\text{Ag}^+$  (0.01 M  $\text{AgNO}_3$ ) as the reference electrode, and Pt wire as the counter electrode. The oxidation potential was measured in  $\text{CH}_2\text{Cl}_2$  with 0.1 M of tetra-*n*-butylammonium hexafluorophosphate ( $n\text{-Bu}_4\text{NPF}_6$ ) as a supporting electrolyte. The UV-vis spectra were recorded on PerkinElmer® UV/Vis/NIR spectrometer (Lambda 950), and the fluorescence spectra were recorded on HITACHI® F-7000 Fluorescence Spectrometer at room temperature. The transient photoluminance decay characteristics and temperature dependence experiments and Absolute PL quantum yield, measured by Edinburgh FLS980 Spectrometer Device Fabrication and Measurement Devices were fabricated by vacuum deposition onto pre-coated ITO glass substrates with sheet resistance of  $15\ \Omega/\text{square}$  at a pressure lower than  $1 \times 10^{-5}$  mbar for organic and metal deposition. Before the fabrication of devices, the ITO glass substrates were cleaned with Decon 90, rinsed in ultrapure water and ethanol, dried in an oven at  $120\text{ }^\circ\text{C}$ , by plasma cleaning process. The devices were fabricated by evaporating organic onto the ITO glass substrates sequentially with an evaporation rate of  $0.5\sim 2\ \text{\AA s}^{-1}$ . LiF and Al were subsequently deposited as the cathode at a deposition rate of  $0.1\ \text{\AA s}^{-1}$  and  $5\ \text{\AA s}^{-1}$ , respectively. EL luminescence spectra and CIE color coordinates were measured with a Spectrascan PR650 photometer, and the current-voltage characteristics were measured with a computer-controlled Keithley 2400 Source Meter under ambient atmosphere.

## 2. X-ray crystallographic data

**Table S1.** Crystal data and structure refinement for **PTZ-ND**

|                                   |                                                               |          |
|-----------------------------------|---------------------------------------------------------------|----------|
| Empirical formula                 | C <sub>32</sub> H <sub>20</sub> N <sub>4</sub> S <sub>2</sub> |          |
| CCDC No.                          | 1893131                                                       |          |
| Formula weight                    | 524.64                                                        |          |
| Temperature                       | 173.15 K                                                      |          |
| Wavelength                        | 1.54178 Å                                                     |          |
| Crystal system                    | Orthorhombic                                                  |          |
| Space group                       |                                                               |          |
| P n m a                           |                                                               |          |
| Unit cell dimensions              | a = 8.18250(10) Å                                             | α = 90 ° |
|                                   | b = 27.5249(2) Å                                              | β = 90 ° |
|                                   | c = 12.85110(10) Å                                            | γ = 90 ° |
| Volume                            | 2894.36(5) Å <sup>3</sup>                                     |          |
| Z                                 | 4                                                             |          |
| Density (calculated)              | 1.204 Mg/m <sup>3</sup>                                       |          |
| Absorption coefficient            | 1.869 mm <sup>-1</sup>                                        |          |
| F(000)                            | 1088                                                          |          |
| Crystal size                      | 0.352 x 0.323 x 0.311 mm <sup>3</sup>                         |          |
| Theta range for data collection   | 3.211 to 75.577 °                                             |          |
| Index ranges                      | -10 ≤ h ≤ 9, -34 ≤ k ≤ 33, -14 ≤ l ≤ 16                       |          |
| Reflections collected             | 24727                                                         |          |
| Independent reflections           | 2965 [R(int) = 0.0253]                                        |          |
| Completeness to theta = 67.679 °  | 99.9 %                                                        |          |
| Absorption correction             | Semi-empirical from equivalents                               |          |
| Max. and min. transmission        | 1.000 and 0.7169                                              |          |
| Refinement method                 | Full-matrix least-squares on F <sup>2</sup>                   |          |
| Data / restraints / parameters    | 2965 / 0 / 175                                                |          |
| Goodness-of-fit on F <sup>2</sup> | 1.112                                                         |          |
| Final R indices [I > 2σ(I)]       | R1 = 0.0418, wR2 = 0.1086                                     |          |
| R indices (all data)              | R1 = 0.0422, wR2 = 0.1089                                     |          |
| Extinction coefficient            | n/a                                                           |          |
| Largest diff. peak and hole       | 0.460 and -0.395 e.Å <sup>-3</sup>                            |          |

**Table S2.** Crystal data and structure refinement for **DMAC-ND**

|                                   |                                                                   |                     |
|-----------------------------------|-------------------------------------------------------------------|---------------------|
| Empirical formula                 | $C_{38}H_{32}N_4$                                                 |                     |
| CCDC No.                          | 1893132                                                           |                     |
| Formula weight                    | 544.67                                                            |                     |
| Temperature                       | 169.99(10) K                                                      |                     |
| Wavelength                        | 1.54184 Å                                                         |                     |
| Crystal system                    | Orthorhombic                                                      |                     |
| Space group                       | P 21 21 21                                                        |                     |
| Unit cell dimensions              | $a = 9.03220(10)$ Å                                               | $\alpha = 90^\circ$ |
|                                   | $b = 12.26750(10)$ Å                                              | $\beta = 90^\circ$  |
|                                   | $c = 25.1471(4)$ Å                                                | $\gamma = 90^\circ$ |
| Volume                            | 2786.36(6) Å <sup>3</sup>                                         |                     |
| Z                                 | 4                                                                 |                     |
| Density (calculated)              | 1.298 Mg/m <sup>3</sup>                                           |                     |
| Absorption coefficient            | 0.593 mm <sup>-1</sup>                                            |                     |
| F(000)                            | 1152                                                              |                     |
| Crystal size                      | 0.245 x 0.213 x 0.031 mm <sup>3</sup>                             |                     |
| Theta range for data collection   | 3.515 to 75.469 °                                                 |                     |
| Index ranges                      | $-10 \leq h \leq 10$ , $-5 \leq k \leq 14$ , $-29 \leq l \leq 31$ |                     |
| Reflections collected             | 18177                                                             |                     |
| Independent reflections           | 5482 [R(int) = 0.0277]                                            |                     |
| Completeness to theta = 67.684 °  | 99.8 %                                                            |                     |
| Absorption correction             | Semi-empirical from equivalents                                   |                     |
| Max. and min. transmission        | 1.00000 and 0.59976                                               |                     |
| Refinement method                 | Full-matrix least-squares on F <sup>2</sup>                       |                     |
| Data / restraints / parameters    | 5482 / 0 / 383                                                    |                     |
| Goodness-of-fit on F <sup>2</sup> | 1.074                                                             |                     |
| Final R indices [I > 2σ(I)]       | R1 = 0.0357, wR2 = 0.0900                                         |                     |
| R indices (all data)              | R1 = 0.0408, wR2 = 0.0973                                         |                     |
| Absolute structure parameter      | -0.14(17)                                                         |                     |
| Extinction coefficient            | n/a                                                               |                     |
| Largest diff. peak and hole       | 0.212 and -0.163 e.Å <sup>-3</sup>                                |                     |

**Table S3.** Crystal data and structure refinement for **PXZ-ND**

|                                   |                                             |                              |
|-----------------------------------|---------------------------------------------|------------------------------|
| Empirical formula                 | $C_{32}H_{20}N_4O_2$                        |                              |
| CCDC No.                          | 1893133                                     |                              |
| Formula weight                    | 492.52                                      |                              |
| Temperature                       | 169.99(10) K                                |                              |
| Wavelength                        | 1.54184 Å                                   |                              |
| Crystal system                    | Monoclinic                                  |                              |
| Space group                       | P 1 21 1                                    |                              |
| Unit cell dimensions              | a = 9.84880(10) Å                           | $\alpha = 90^\circ$          |
|                                   | b = 7.41860(10) Å                           | $\beta = 104.8480(10)^\circ$ |
|                                   | c = 16.2441(2) Å                            | $\gamma = 90^\circ$          |
| Volume                            | 1147.23(2) Å <sup>3</sup>                   |                              |
| Z                                 | 2                                           |                              |
| Density (calculated)              | 1.426 Mg/m <sup>3</sup>                     |                              |
| Absorption coefficient            | 0.730 mm <sup>-1</sup>                      |                              |
| F(000)                            | 512                                         |                              |
| Crystal size                      | 0.3 x 0.15 x 0.1 mm <sup>3</sup>            |                              |
| Theta range for data collection   | 2.814 to 75.158 °                           |                              |
| Index ranges                      | -12<=h<=11, -8<=k<=8, -20<=l<=20            |                              |
| Reflections collected             | 21203                                       |                              |
| Independent reflections           | 4517 [R(int) = 0.0236]                      |                              |
| Completeness to theta = 67.684 °  | 99.9 %                                      |                              |
| Absorption correction             | Semi-empirical from equivalents             |                              |
| Max. and min. transmission        | 1.00000 and 0.77008                         |                              |
| Refinement method                 | Full-matrix least-squares on F <sup>2</sup> |                              |
| Data / restraints / parameters    | 4517 / 1 / 343                              |                              |
| Goodness-of-fit on F <sup>2</sup> | 1.067                                       |                              |
| Final R indices [I>2sigma(I)]     | R1 = 0.0320, wR2 = 0.0803                   |                              |
| R indices (all data)              | R1 = 0.0325, wR2 = 0.0810                   |                              |
| Absolute structure parameter      | 0.04(4)                                     |                              |
| Extinction coefficient            | n/a                                         |                              |
| Largest diff. peak and hole       | 0.114 and -0.250 e.Å <sup>-3</sup>          |                              |

### 3. Schematic molecular conformations and interactions

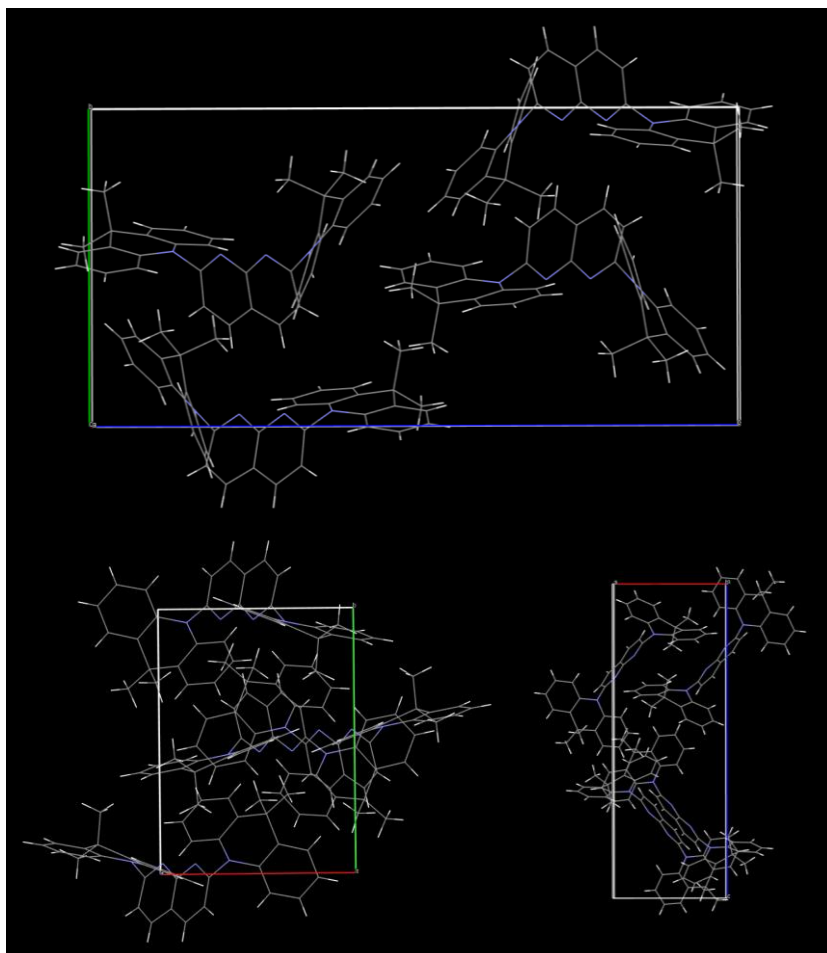

**Fig. S1.** Schematic molecular conformations and interactions in the crystal structure of DMAC-ND.

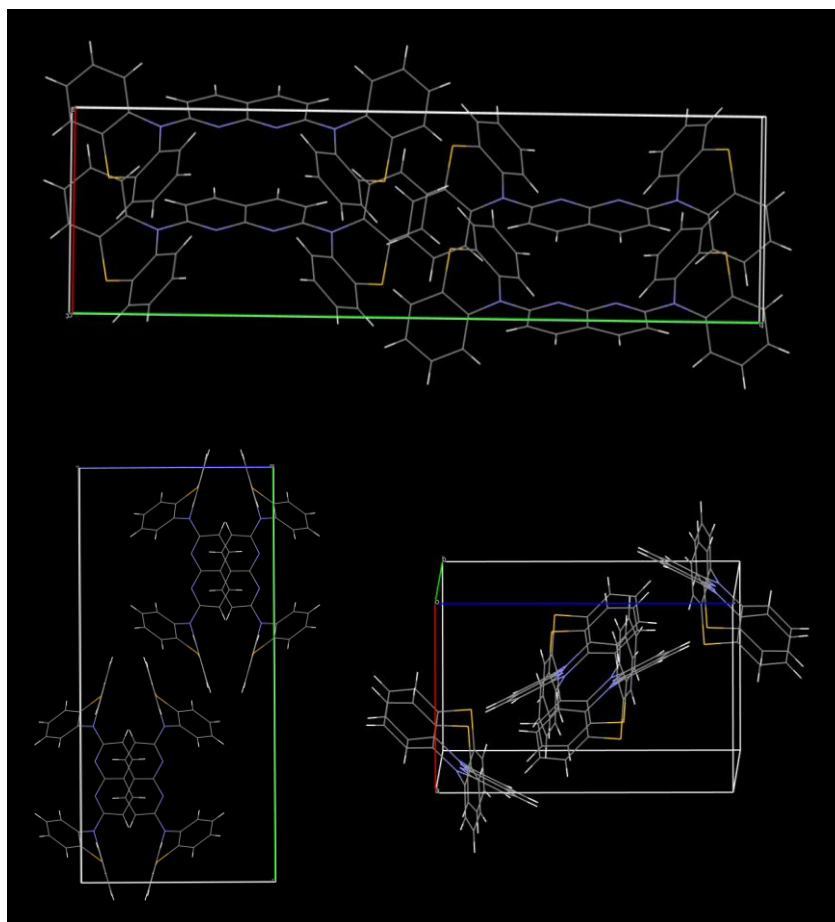

**Fig. S2.** Schematic molecular conformations and interactions in the crystal structure of PTZ-ND.

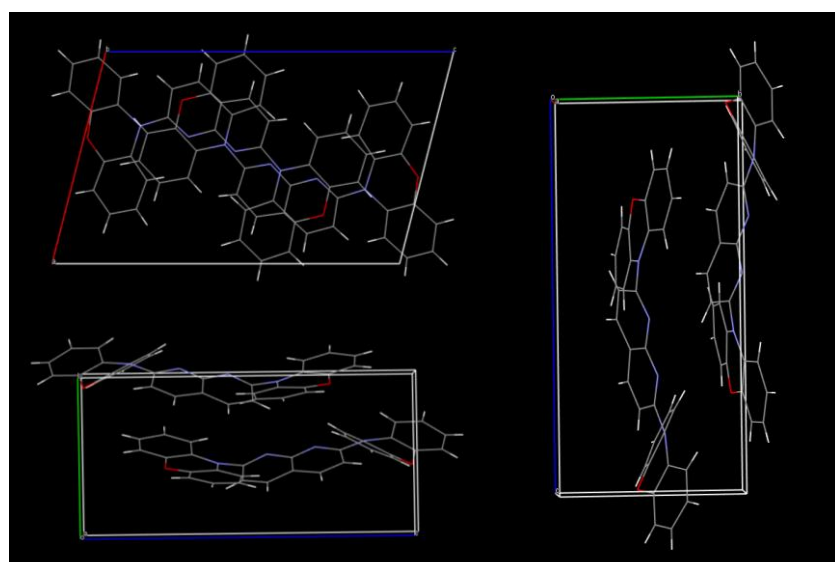

**Fig. S3.** Schematic molecular conformations and interactions in the crystal structure of PXZ-ND.

#### 4. DFT calculations

The ground state geometries of three molecules are optimized by density functional theory (DFT) using the B3LYP functional. In order to investigate the energies and the transition characters of the low-lying excited singlet and triplet states, time-dependent density functional theory (TDDFT) with B3LYP functional, was used to calculate the vertical excitation energies for  $S_1$  and  $T_1$  as well as  $\Delta E_{ST}$ . All the above calculations were carried out by using Gaussian 09 with the 6-31G\*\* basis set.<sup>S1</sup>

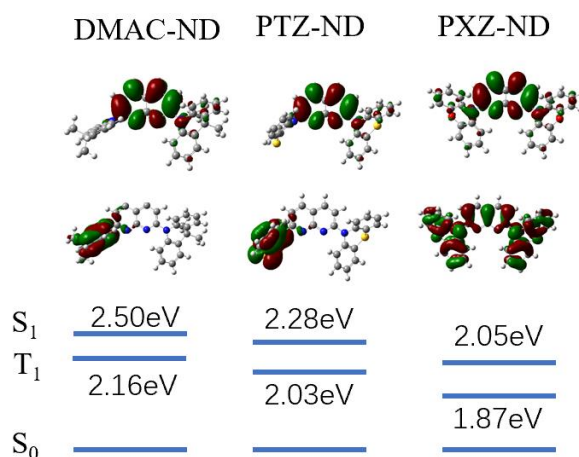

**Fig. S4** Energy diagram of calculated singlet and triplet excited states for **DMAC-ND**, **PTZ-ND** and **PXZ-ND**.

#### 5. TGA and DSC

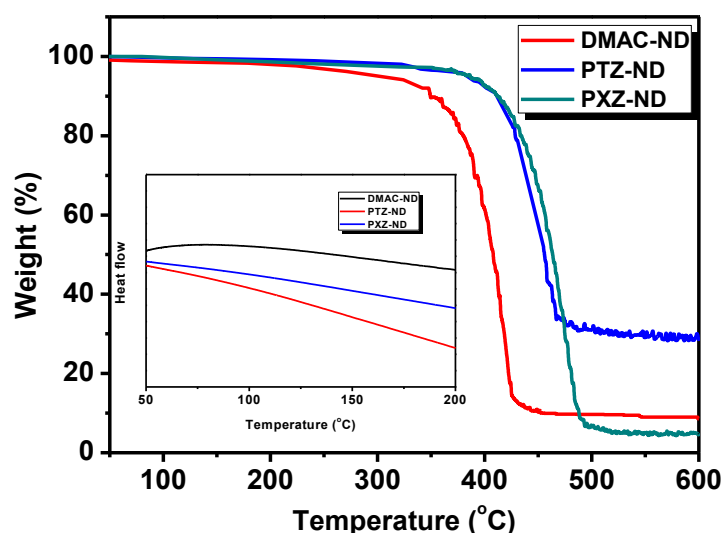

**Fig. S5.** TGA traces of **DMAC-ND**, **PTZ-ND** and **PXZ-ND** at a heating rate of  $10\text{ }^{\circ}\text{C min}^{-1}$ . Inset: DSC traces of **DMAC-ND**, **PTZ-ND** and **PXZ-ND** at a heating rate of  $10\text{ }^{\circ}\text{C min}^{-1}$ .



## 6. Photophysical properties

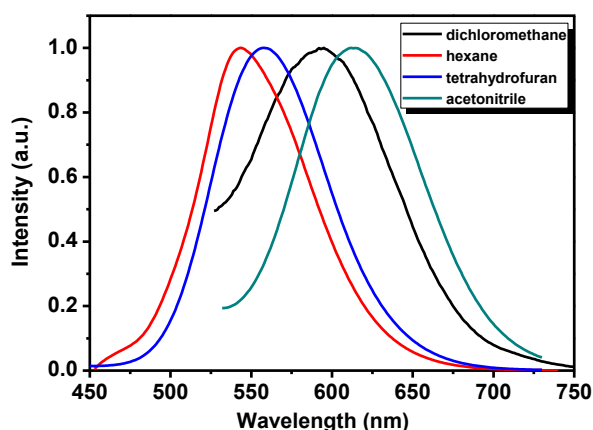

**Fig. S6.** FL spectra of **DMAC-ND** in different solvents ( $1 \times 10^{-5}$  M).

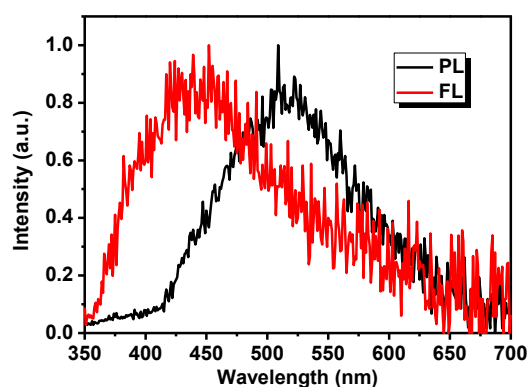

**Fig. S7.** Normalized photoluminescence and phosphorescence spectra of **1,8-ND** in neat films at 77K.

**Table S4.** Physical properties of **1,8-ND** in neat films

| $\lambda_{\text{FL}}^{\text{a}}$ | $\lambda_{\text{Phos}}^{\text{b}}$ | $E_{\text{S}_1}^{\text{c}}$ | $E_{\text{T}_1}^{\text{d}}$ | $\Delta E_{\text{ST}}^{\text{e}}$ |
|----------------------------------|------------------------------------|-----------------------------|-----------------------------|-----------------------------------|
| 441 nm                           | 516 nm                             | 2.81 eV                     | 2.40 eV                     | 0.41 eV                           |

<sup>a</sup>Fluorescence and <sup>b</sup>phosphorescence emission peaks measured at 77 K. <sup>c</sup> $S_1$  and <sup>d</sup> $T_1$  energy levels ( $\approx 1240/\lambda$ ). <sup>e</sup> $\Delta E_{\text{ST}} = E_{\text{S}_1} - E_{\text{T}_1}$ .

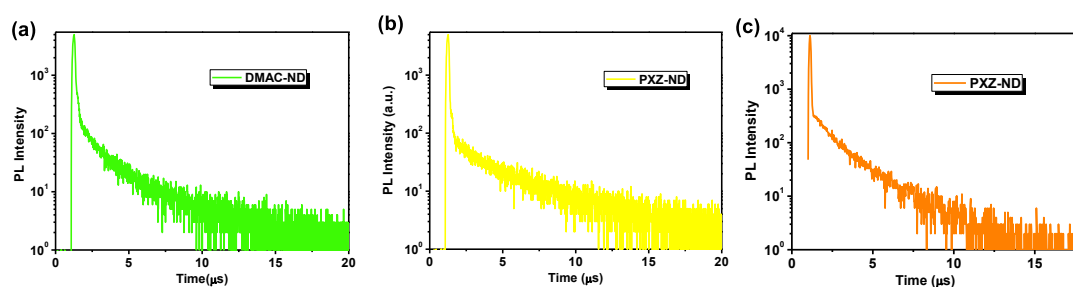

**Fig. S8.** Transient PL spectra of (a) **DMAC-ND**, (b) **PTZ-ND** and (c) **PXZ-ND** doped into mCP films (5 wt%) at 300 K.

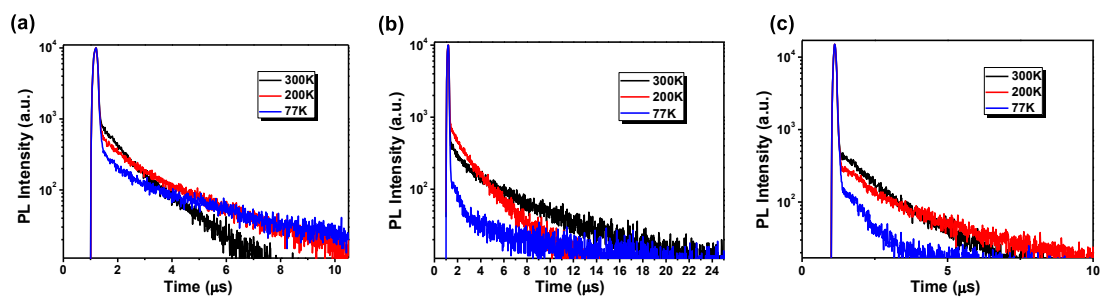

**Fig. S9.** Transient PL spectra of (a) **DMAC-ND**, (b) **PTZ-ND**, and (c) **PXZ-ND** doped into mCP films (3 wt%) from 100 to 300 K.

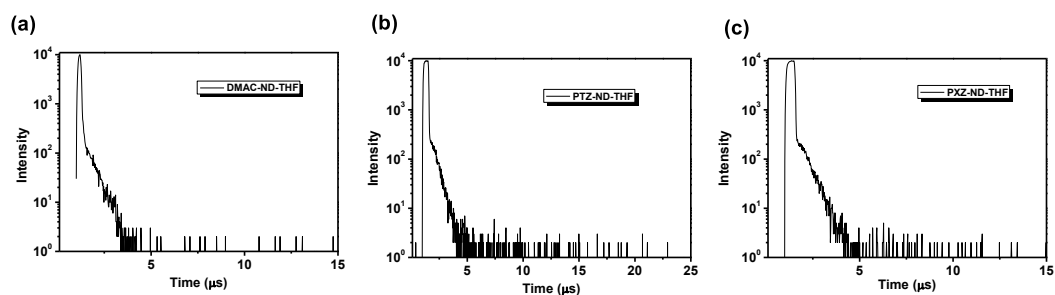

**Fig. S10.** Transient PL spectra of (a) **DMAC-ND**, (b) **PTZ-ND** and (c) **PXZ-ND** in THF solution at 300 K.

## 7. Device fabrication and characterization

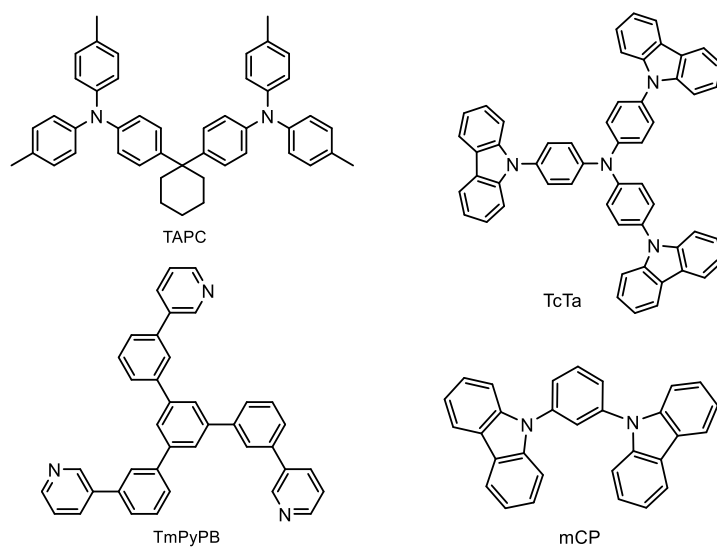

**Fig. S11.** Molecular structures of the compounds used in the devices.

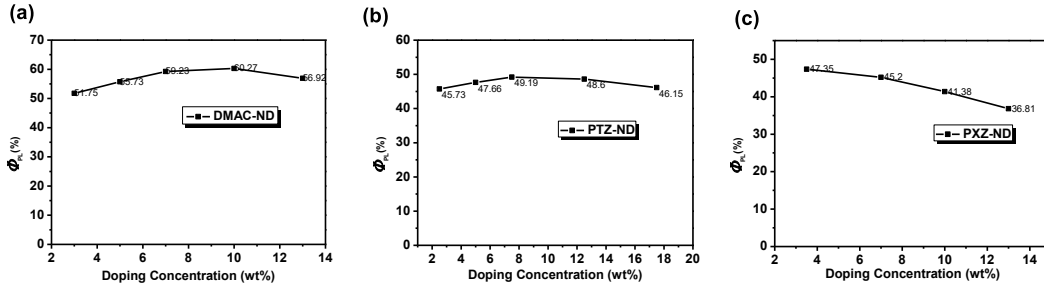

**Fig. S12.**  $\Phi_{PL}$  versus doping concentration of (a) **DMAC-ND**, (b) **PTZ-ND** and (c) **PXZ-ND** doped in mCP films.

**Table S5.** The summary of best EL characteristics for **DMAC-ND** with different host materials.

| Host material | $V_{on}^a$ (V) | EQE <sup>b</sup> (%) | PE <sup>c</sup> (lm/W) | CE <sup>d</sup> (cd/A) |
|---------------|----------------|----------------------|------------------------|------------------------|
| CBP           | 7.2            | 9.92                 | 10.11                  | 31.54                  |
| mCP           | 3.1            | 14.10                | 36.90                  | 38.11                  |
| mCBP          | 3.7            | 8.90                 | 16.65                  | 21.20                  |

<sup>a</sup> The turn-on voltage recorded at a brightness of 1 cd/m<sup>2</sup>. <sup>b</sup> Maximal external quantum efficiency. <sup>c</sup> Maximal power efficiency. <sup>d</sup> Maximal current efficiency.

**Table S6.** The summary of EL characteristics for **DMAC-ND**, **PTZ-ND** and **PXZ-ND** with different concentration in mCP.

|                | Concentration (wt %) | $V_{on}^a$ (V) | EQE <sup>b</sup> (%) | PE <sup>c</sup> (lm/W) | CE <sup>d</sup> (cd/A) |
|----------------|----------------------|----------------|----------------------|------------------------|------------------------|
| <b>DMAC-ND</b> | 3                    | 3.4            | 10.1                 | 21.3                   | 25.1                   |
|                | 5                    | 3.4            | 11.4                 | 26.4                   | 27.7                   |
|                | 7                    | 3.2            | 13.1                 | 28.5                   | 33.6                   |
|                | 10                   | 3.1            | 14.1                 | 36.9                   | 38.1                   |
|                | 13                   | 3.2            | 11.8                 | 29.6                   | 30.1                   |
| <b>PTZ-ND</b>  | 2.5                  | 3.6            | 10.6                 | 27.0                   | 31.8                   |
|                | 5                    | 3.6            | 11.7                 | 29.0                   | 34.1                   |
|                | 7.5                  | 3.4            | 13.0                 | 31.4                   | 40.9                   |
|                | 12                   | 3.5            | 12.3                 | 32.9                   | 37.7                   |
|                | 17.5                 | 3.6            | 11.2                 | 29.0                   | 34.2                   |
| <b>PXZ-ND</b>  | 3.5                  | 3.0            | 13.4                 | 30.7                   | 43.2                   |
|                | 7                    | 3.1            | 12.4                 | 29.8                   | 40.1                   |
|                | 10                   | 3.1            | 11.1                 | 30.7                   | 35.2                   |
|                | 13                   | 3.1            | 9.8                  | 28.8                   | 31.1                   |

<sup>a</sup> The turn-on voltage recorded at a brightness of 1 cd/m<sup>2</sup>. <sup>b</sup> Maximal external quantum efficiency. <sup>c</sup> Maximal power efficiency. <sup>d</sup> Maximal current efficiency.



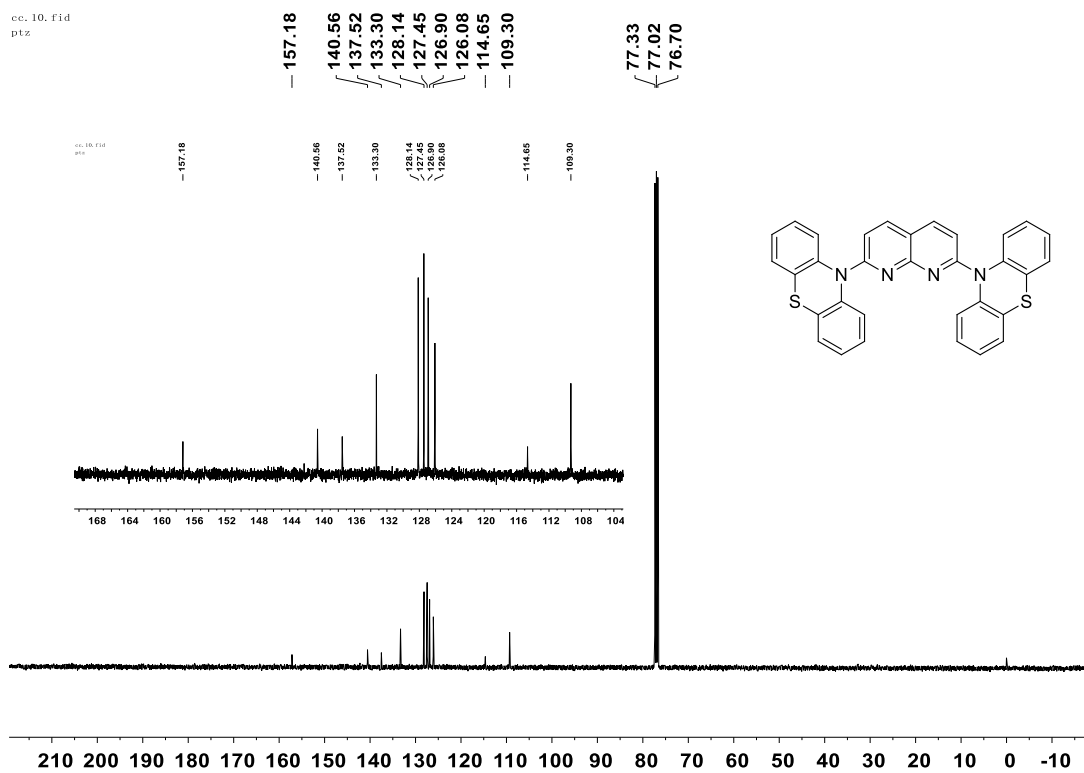

**Fig. S14**  $^{13}\text{C}$  NMR spectrum (101 HMz,  $\text{CDCl}_3$ , 300K) of **PTZ-ND**.

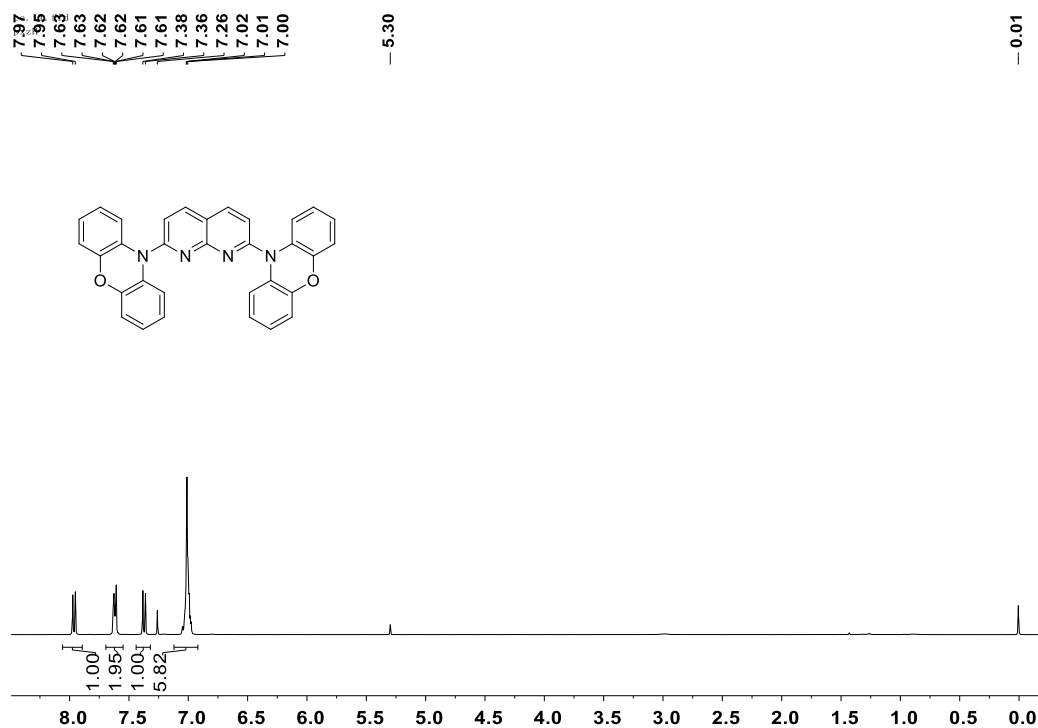

**Fig. S15**  $^1\text{H}$  NMR spectrum (400 MHz,  $\text{CDCl}_3$ , 300K) of **PXZ-ND**.

cc. 12, fid  
pxzh

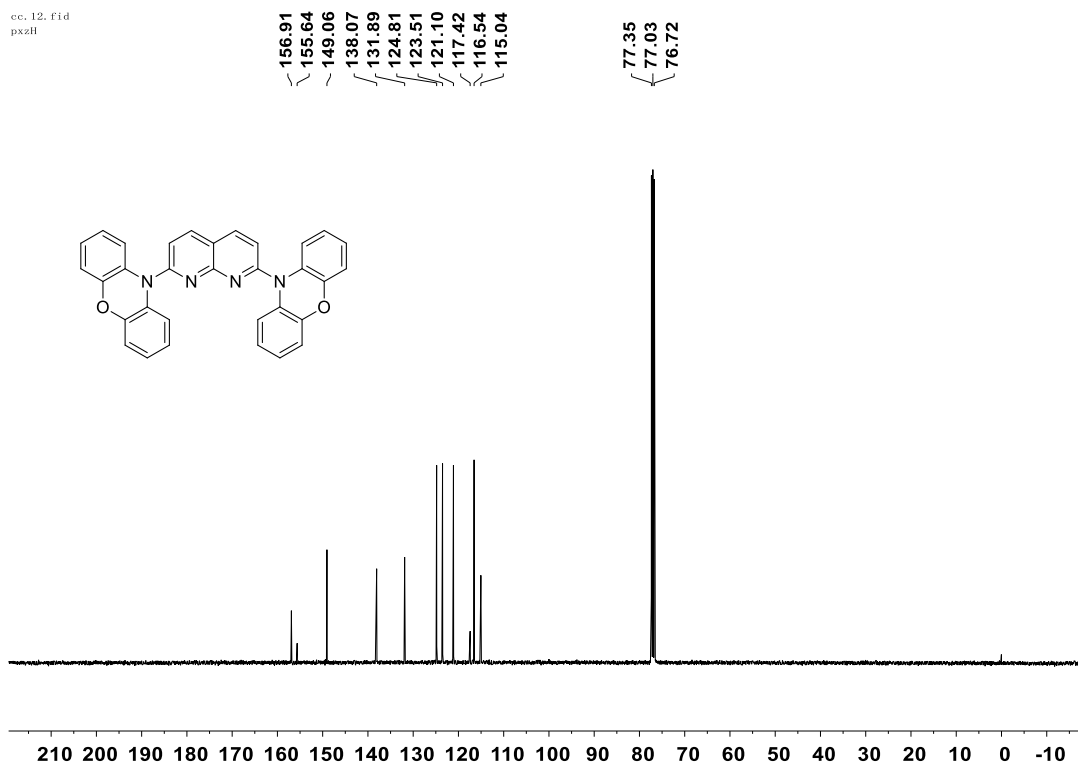

Fig. S16 <sup>13</sup>C NMR spectrum (101 HMz, CDCl<sub>3</sub>, 300K) of PXZ-ND.

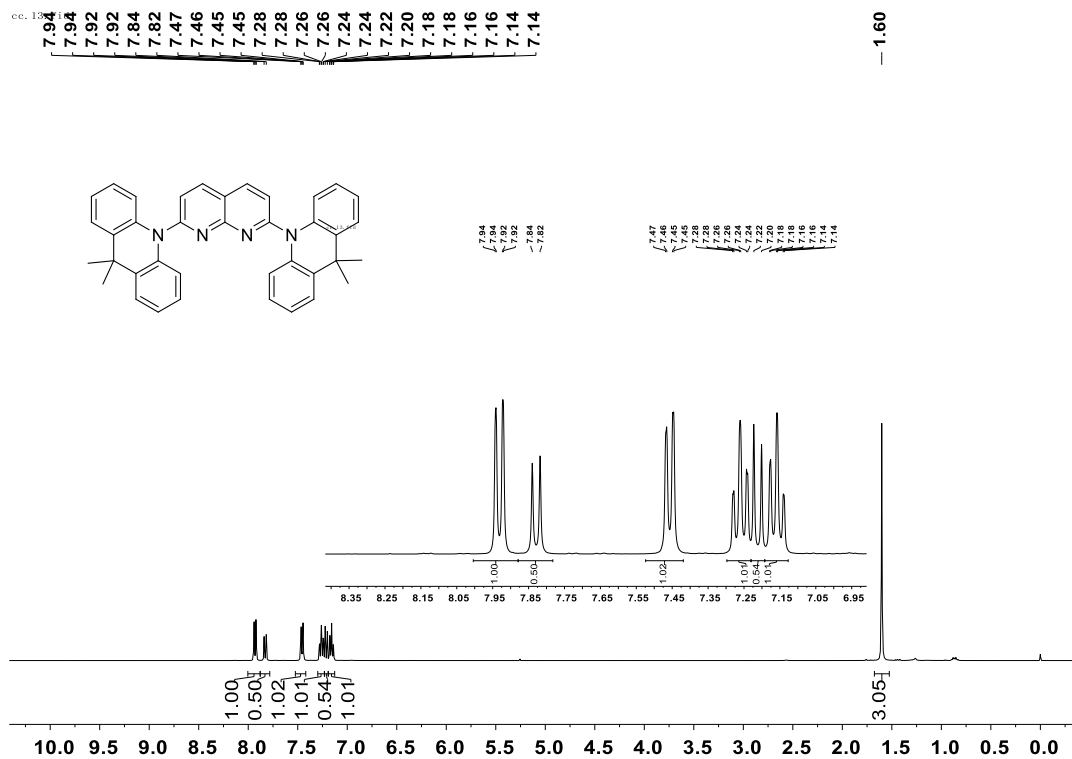

Fig. S17. <sup>1</sup>H NMR spectrum (400 MHz, CDCl<sub>3</sub>, 300K) of DMAC-ND.

cc. 14. fid

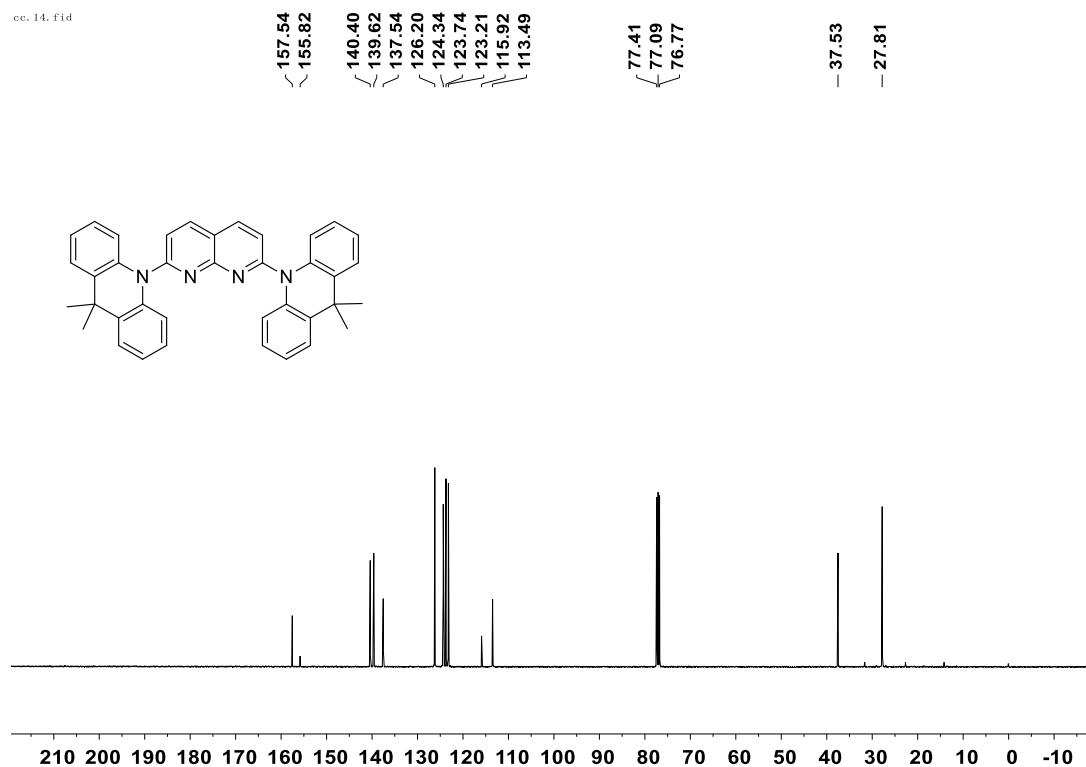

**Fig. S18** <sup>13</sup>C NMR spectrum (101 HMz, CDCl<sub>3</sub>, 300K) of **DMAC-ND**.

## 10. Reference

S1. Gaussian 09, Revision D.01, M. J. Frisch, G. W. Trucks, H. B. Schlegel, G. E. Scuseria, M. A. Robb, J. R. Cheeseman, G. Scalmani, V. Barone, B. Mennucci, G. A. Petersson, H. Nakatsuji, M. Caricato, X. Li, H. P. Hratchian, A. F. Izmaylov, J. Bloino, G. Zheng, J. L. Sonnenberg, M. Hada, M. Ehara, K. Toyota, R. Fukuda, J. Hasegawa, M. Ishida, T. Nakajima, Y. Honda, O. Kitao, H. Nakai, T. Vreven, J. A. Montgomery, Jr., J. E. Peralta, F. Ogliaro, M. Bearpark, J. J. Heyd, E. Brothers, K. N. Kudin, V. N. Staroverov, T. Keith, R. Kobayashi, J. Normand, K. Raghavachari, A. Rendell, J. C. Burant, S. S. Iyengar, J. Tomasi, M. Cossi, N. Rega, J. M. Millam, M. Klene, J. E. Knox, J. B. Cross, V. Bakken, C. Adamo, J. Jaramillo, R. Gomperts, R. E. Stratmann, O. Yazyev, A. J. Austin, R. Cammi, C. Pomelli, J. W. Ochterski, R. L. Martin, K. Morokuma, V. G. Zakrzewski, G. A. Voth, P. Salvador, J. J. Dannenberg, S. Dapprich, A. D. Daniels, O. Farkas, J. B. Foresman, J. V. Ortiz, J. Cioslowski, and D. J. Fox, Gaussian, Inc., Wallingford CT, **2013**.
